# Supplementary material for: Emergence of a Stage-Dependent Human Liver Disease Signature with Directed Differentiation of Alpha-1 Antitrypsin-Deficient iPS Cells
Source: PubMed Central journal article supplement (PMC4437473; doi:10.1016/j.stemcr.2015.02.021), 2015-04-02
Supplement: mmc1.pdf [file mmc1.pdf]

Stem Cell Reports, Volume 4

Supplemental Information

# **Emergence of a Stage-Dependent Human Liver Disease Signature with Directed Differentiation of Alpha-1 Antitrypsin-Deficient iPS Cells**

**Andrew A. Wilson, Lei Ying, Marc Liesa, Charis-Patricia Segeritz, Jason A. Mills, Steven S. Shen, Jyhchang Jean, Geordie C. Lonza, Derek C. Liberti, Alex H. Lang, Jean Nazaire, Adam C. Gower, Franz-Josef Müller, Pankaj Mehta, Adriana Ordóñez, David A. Lomas, Ludovic Vallier, George J. Murphy, Gustavo Mostoslavsky, Avrum Spira, Orian S. Shirihai, Maria I. Ramirez, Paul Gadue, and Darrell N. Kotton**

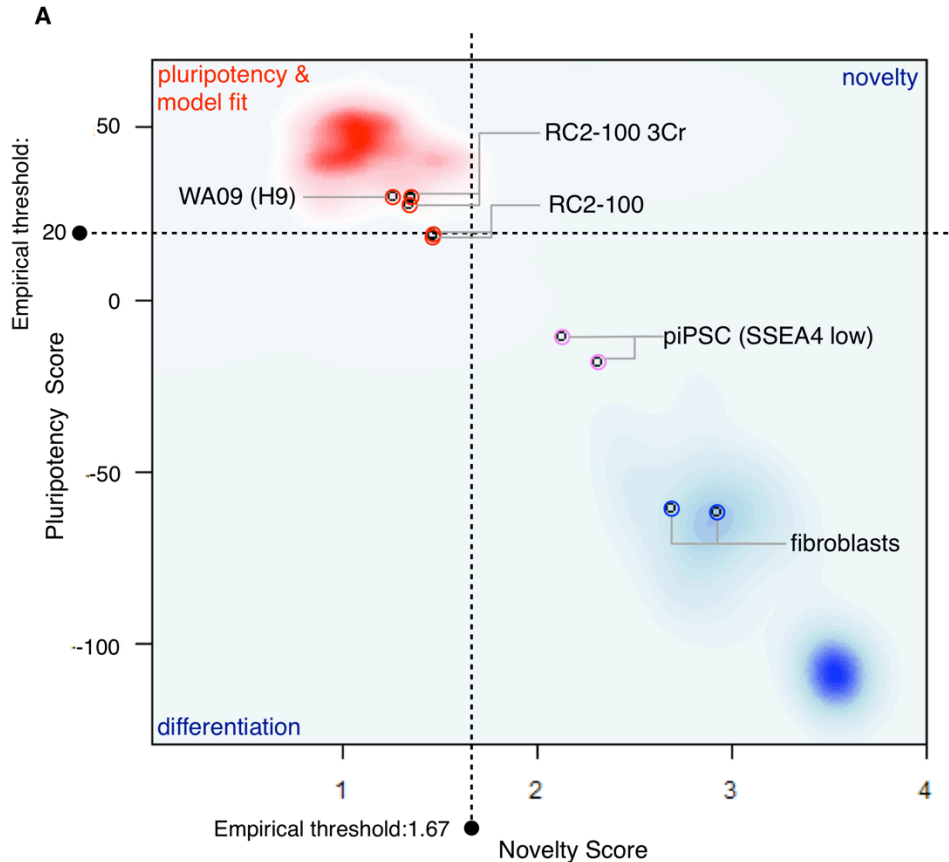

**Figure S1** Pluritest scores based on global transcriptomic profiling of PiZZ iPSCs before and after Cre-mediated excision of the STEMCCA reprogramming vector. Pluritest characterization of the transcriptome of PiZZ iPSCs compared to benchmark pluripotent and partially reprogrammed clones demonstrates that PiZZ clones reprogrammed with the floxed STEMCCA polycistronic lentiviral reprogramming cassette have a high pluripotency score and cluster with ESCs as opposed to partially reprogrammed iPSCs. PluriTest (Muller et al. Nat Methods 2011 Mar 6) is a bioinformatic assay for accurate assessment of pluripotency. PluriTest analyzes the expression of a large number of pluripotency associated transcripts with a “Pluripotency Score” and tests for the conformity of a given sample with the global transcriptional profile typical for genetically and epigenetically normal human embryonic and induced pluripotent stem cells with a metric termed “Novelty Score”. The PluriTest assay provides a global statistical model for the genome-wide transcriptional landscape of human PSC. PluriTest results were plotted on the empirically defined density distribution for previously referenced pluripotent cells (red cloud) and somatic cells (blue cloud (Müller F-J, Schuldt BM, Williams R, Mason D, Altun G, Papapetrou EP, et al. A bioinformatic assay for pluripotency in human cells. Nat Methods. 2011 Mar 6 )

**A**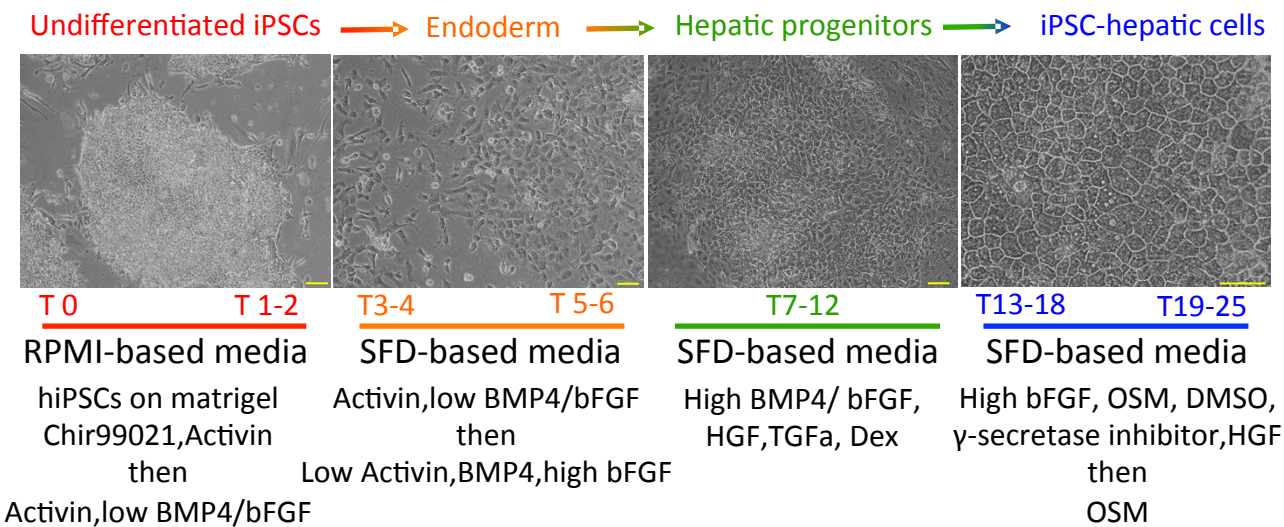**B**

T24:

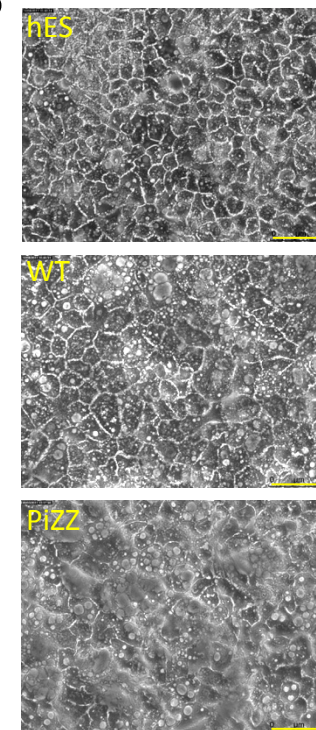**C**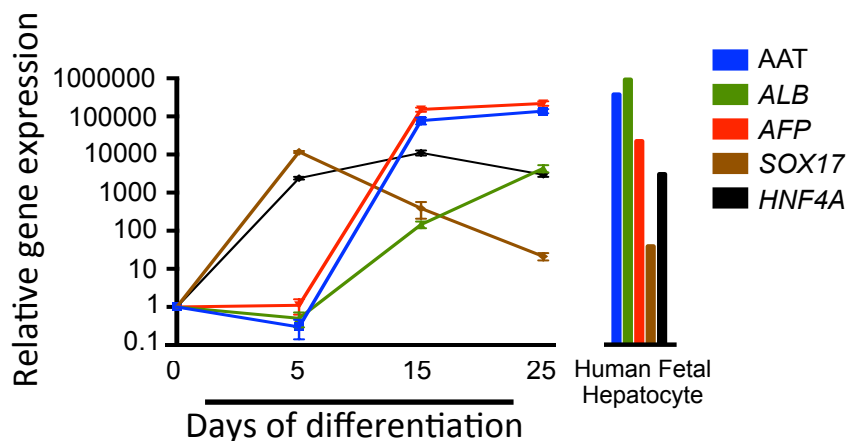

**Figure S2** iPSC directed differentiation protocol. **(A)** Undifferentiated iPSCs are passed off of MEFs onto gelatin-coated dishes 2 days before starting differentiation. At T0, endodermal differentiation is initiated by 1 day of media supplementation with Chir99021 and Activin A. Media is changed daily through T6 and every other day for the remainder of the protocol. The base media is changed to SFD beginning at T3. Scale bars: 100  $\mu$ m. **(B)** At T24, cells exhibit a characteristic polygonal hepatocyte-like morphology. Scale bars: 100  $\mu$ m. **(C)** qPCR demonstrates gene expression levels at key developmental time points during differentiation compared to T0 iPSCs. *Sox17* and *HNF4A* expression levels are increased at the endodermal stage while expression of hepatic genes, such as AAT, albumin, and *AFP* increases later during differentiation. Gene expression levels at hepatic stage are similar to those seen in human fetal hepatocytes.  $n = 3$  biological replicates. Data are represented as mean  $\pm$  SEM.

Figure S3

**Figure S3** Flow cytometric characterization of ESC, WT iPSC, and PiZZ iPSC lines at key developmental timepoints. All 9 pluripotent stem cell lines were analyzed at the undifferentiated stage (T0), definitive endoderm stage (T5), or during hepatic specification and maturation (T7-T24) with stage-specific markers at each time point. Cells were sorted using the indicated gates for TRA-1-81+/SSEA3+ (T0) or C-kit+/CXCR4+ (T5) cells. The AAT/FOXA1 protein expression kinetic exhibits some line to line variation but all lines achieve high levels of coexpression by T24.

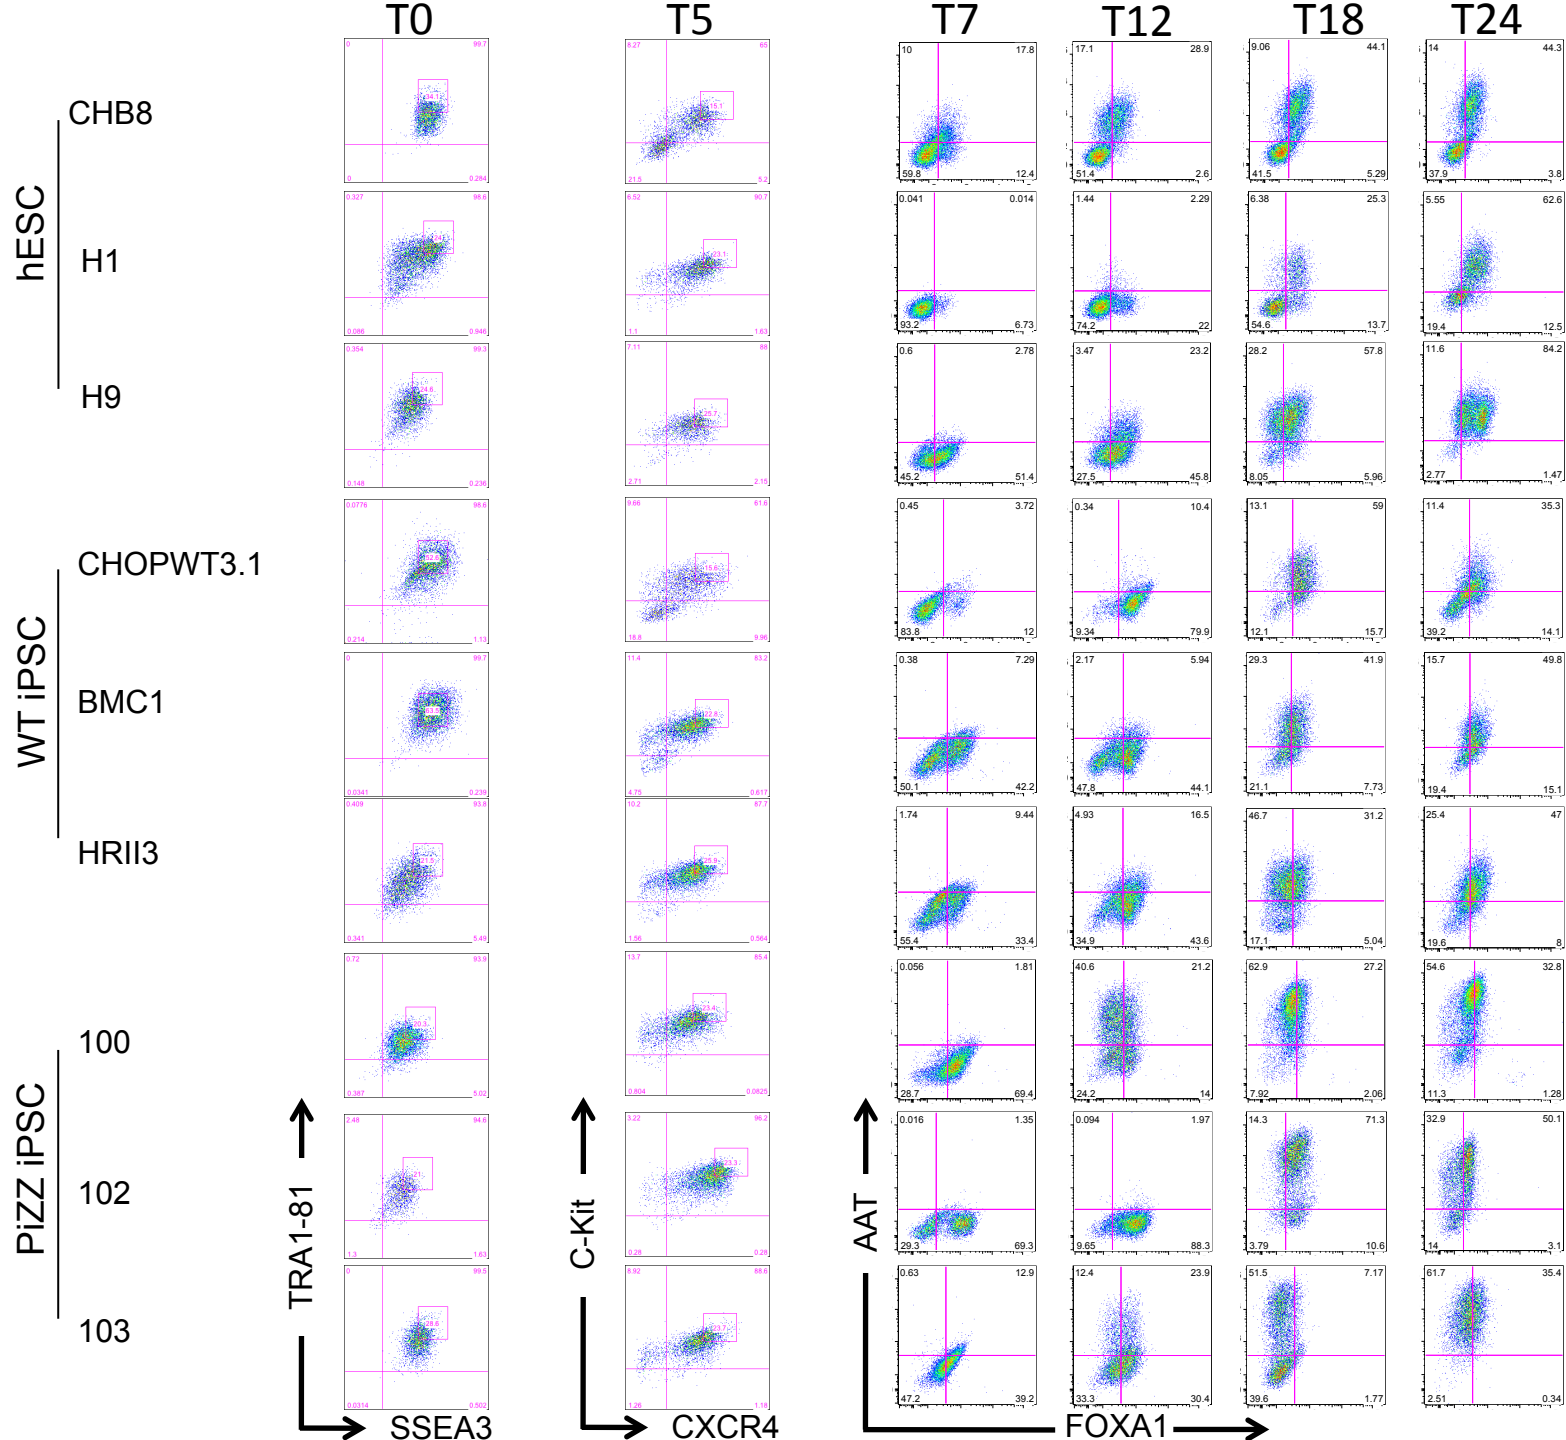

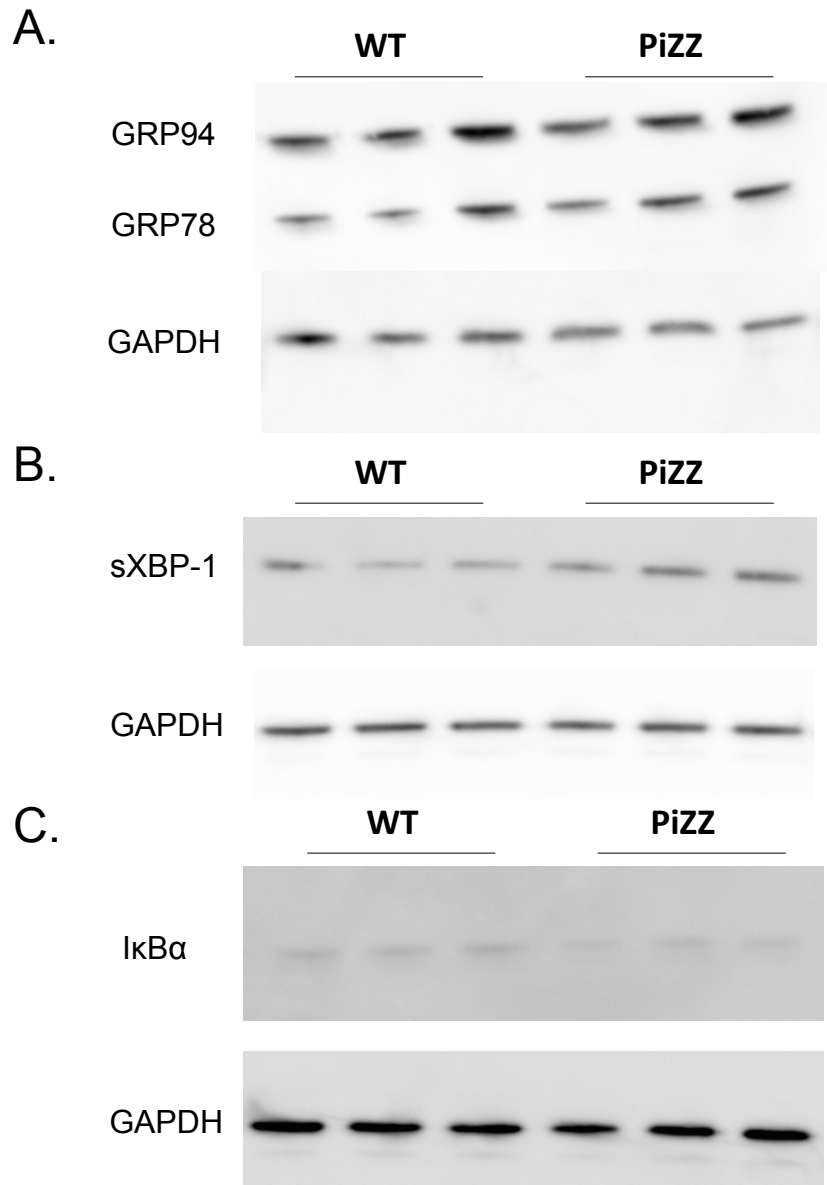

**Figure S4** Differential expression of UPR-associated proteins in PiZZ iPSC-hepatic cells. Cell lysates were prepared from triplicate wells of differentiating cells at T16 or T18. Western blots were then performed using primary antibodies against GRP78, GRP94 (**A**), the mature spliced form of XBP-1 (**B**), and the NF- $\kappa$ B inhibitory protein I $\kappa$ B $\alpha$ . In each case, membranes were stripped and re-probed for GAPDH to control for protein loading.

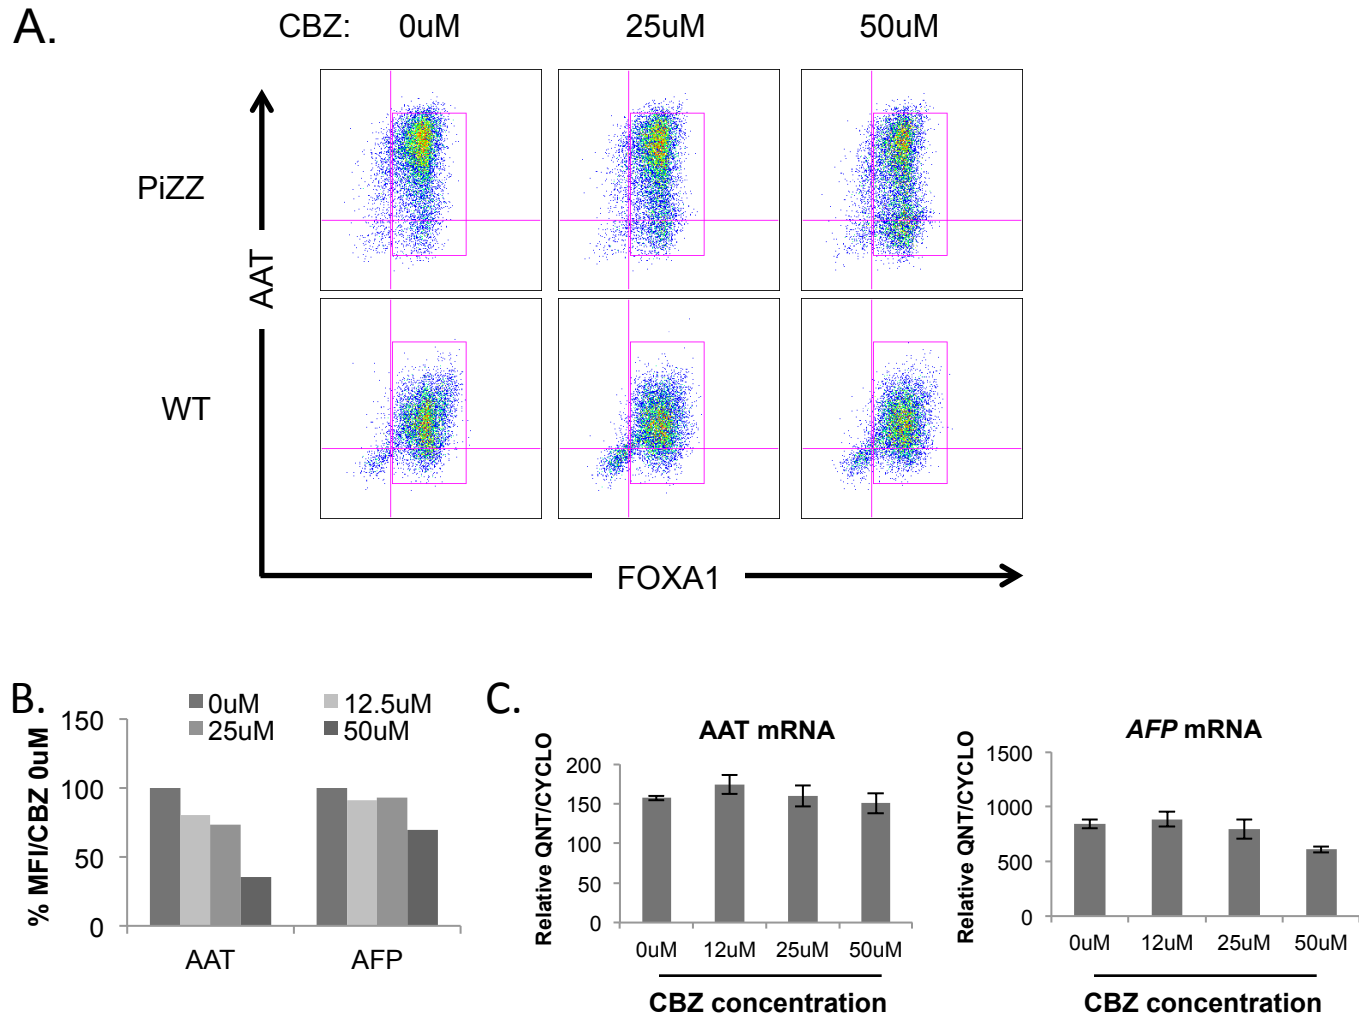

**Figure S5** CBZ treatment decreases intracellular AAT in PiZZ iPSC-hepatic cells. **(A)** Flow cytometry demonstrates that the mean fluorescence intensity (MFI) of intracellular AAT antibody staining decreases with CBZ treatment in PiZZ, but not WT, iPSC-hepatic cells. **(B)** MFI of intracellular AAT antibody staining decreases with increasing CBZ concentration in PiZZ cells. This effect is not seen with intracellular AFP. **(C)** CBZ treatment does not affect levels of AAT or *AFP* transcription.  $n = 3$  independent experiments. Data are represented as mean  $\pm$  SEM.



| TABLE: DISEASE SIGNATURE: 2-WAY ANOVA INTERACTION EFFECT; FDR<0.25 |                    |                         |              |                           |
|--------------------------------------------------------------------|--------------------|-------------------------|--------------|---------------------------|
| Gene_Symbol                                                        | adj.P.Val (FDR)    | logFC Alpha vs iPSC T24 | P.Value      | mRNA.Accession            |
| <b>DNAH5</b>                                                       | <b>0.001387322</b> |                         | 1.889999333  | 4.75E-08 NM_001369        |
| <b>CASP4</b>                                                       | <b>0.014884331</b> |                         | 1.907756     | 1.46E-06 NM_033306        |
| <b>CFH</b>                                                         | <b>0.014884331</b> |                         | 2.682600333  | 1.88E-06 NM_000186        |
| <b>HAVCR2</b>                                                      | <b>0.014884331</b> |                         | 2.277453333  | 2.04E-06 NM_032782        |
| <b>ERAP2</b>                                                       | <b>0.029128034</b> |                         | 2.761159     | 4.99E-06 NM_022350        |
| <b>KCNJ6</b>                                                       | <b>0.04186302</b>  |                         | 1.373596     | 8.60E-06 NM_002240        |
| ---                                                                | <b>0.109360946</b> |                         | 1.046387333  | 2.62E-05 ENST00000474296  |
| <b>WFDC10B</b>                                                     | <b>0.116203146</b> |                         | 1.470892667  | 3.58E-05 NM_172006        |
| <b>GRM4</b>                                                        | <b>0.116203146</b> |                         | 0.798611667  | 3.61E-05 NM_000841        |
| ---                                                                | <b>0.116203146</b> |                         | -0.723990667 | 3.98E-05 NM_033534.1      |
| <b>TPEC</b>                                                        | <b>0.14674925</b>  |                         | -1.188121667 | 5.53E-05 NM_012252        |
| ---                                                                | <b>0.156395992</b> |                         | 0.467866333  | 6.82E-05 ENST00000517114  |
| <b>CA10</b>                                                        | <b>0.156395992</b> |                         | 0.965961333  | 6.96E-05 NM_001082533     |
| <b>CGA</b>                                                         | <b>0.172961529</b> |                         | -1.958114    | 8.29E-05 NM_000735        |
| <b>CCL20</b>                                                       | <b>0.181722404</b> |                         | 2.338906667  | 9.92E-05 NM_004591        |
| ---                                                                | <b>0.181722404</b> |                         | 0.719536333  | 0.0001026 ENST00000482613 |
| <b>WIF1</b>                                                        | <b>0.181722404</b> |                         | -1.585783    | 0.0001233 NM_007191       |
| <b>DLG3</b>                                                        | <b>0.181722404</b> |                         | -0.57688     | 0.0001283 NM_021120       |
| ---                                                                | <b>0.181722404</b> |                         | 0.486010667  | 0.0001304 ENST00000515976 |
| <b>IL4R</b>                                                        | <b>0.181722404</b> |                         | 0.987948667  | 0.0001421 NM_000418       |
| <b>RNF133</b>                                                      | <b>0.181722404</b> |                         | 1.055310333  | 0.0001536 NM_139175       |
| <b>LOC100133</b>                                                   | <b>0.181722404</b> |                         | 1.326300667  | 0.0001538 AY358688        |
| <b>LSM14B</b>                                                      | <b>0.181722404</b> |                         | -0.522890667 | 0.0001562 NM_144703       |
| <b>RNF148</b>                                                      | <b>0.181722404</b> |                         | 1.341163333  | 0.0001578 NM_198085       |
| <b>SERPINA3</b>                                                    | <b>0.181722404</b> |                         | 1.056103667  | 0.000164 NM_001085        |
| ---                                                                | <b>0.181722404</b> |                         | 0.479801     | 0.0001648 BC031827        |
| <b>TUBB4</b>                                                       | <b>0.181722404</b> |                         | -1.582957333 | 0.0001749 NM_006087       |
| ---                                                                | <b>0.181722404</b> |                         | 1.277718     | 0.0001762 ENST00000472474 |
| <b>SQRDL</b>                                                       | <b>0.181722404</b> |                         | 1.140718333  | 0.0001829 NM_021199       |
| ---                                                                | <b>0.181722404</b> |                         | 0.622869     | 0.0002112 ENST00000463780 |
| ---                                                                | <b>0.181722404</b> |                         | 0.622869     | 0.0002112 ENST00000463780 |
| ---                                                                | <b>0.181722404</b> |                         | 1.922892333  | 0.0002119 ENST00000517171 |
| <b>DPPA3</b>                                                       | <b>0.181722404</b> |                         | -1.757035    | 0.000214 NM_199286        |
| <b>ROCK1P1</b>                                                     | <b>0.181722404</b> |                         | -1.561588333 | 0.0002168 NR_033770       |
| ---                                                                | <b>0.181722404</b> |                         | 0.604009667  | 0.0002178 ENST00000517281 |
| ---                                                                | <b>0.187512805</b> |                         | 1.229577333  | 0.0002405                 |
| ---                                                                | <b>0.187512805</b> |                         | 0.834795     | 0.0002476 ENST00000391266 |
| <b>AMY2A</b>                                                       | <b>0.187512805</b> |                         | -0.95882     | 0.0002559 NM_000699       |
| <b>FOXO4</b>                                                       | <b>0.187512805</b> |                         | -1.266531333 | 0.0002681 NM_005938       |
| ---                                                                | <b>0.187512805</b> |                         | 1.068346667  | 0.000274                  |
| <b>AMY1A</b>                                                       | <b>0.187512805</b> |                         | -0.854025    | 0.0002829 NM_004038       |
| <b>AMY1A</b>                                                       | <b>0.187512805</b> |                         | -0.854025    | 0.0002829 NM_004038       |
| <b>AMY1A</b>                                                       | <b>0.187512805</b> |                         | -0.854025    | 0.0002829 NM_004038       |
| <b>C1R</b>                                                         | <b>0.187512805</b> |                         | 0.820498333  | 0.0002853 NM_001733       |
| <b>ZNF70</b>                                                       | <b>0.187512805</b> |                         | -0.585746667 | 0.0002933 NM_021916       |
| <b>SCN3A</b>                                                       | <b>0.187512805</b> |                         | 1.276423333  | 0.0002983 NM_006922       |
| <b>SLAMF8</b>                                                      | <b>0.187512805</b> |                         | -0.866773333 | 0.000314 NM_020125        |
| <b>CFHR1</b>                                                       | <b>0.187512805</b> |                         | 2.519885667  | 0.0003146 NM_002113       |
| <b>HSD3BP4</b>                                                     | <b>0.187512805</b> |                         | 1.100559     | 0.0003147 NR_033781       |
| <b>ERVFRDE1</b>                                                    | <b>0.194279346</b> |                         | -0.507456333 | 0.0003375 NM_207582       |
| <b>APOL1</b>                                                       | <b>0.194279346</b> |                         | 2.046024333  | 0.0003429 NM_145343       |
| <b>OVCH2</b>                                                       | <b>0.194279346</b> |                         | 2.153060333  | 0.0003483 NM_198185       |
| <b>GEM</b>                                                         | <b>0.194279346</b> |                         | -1.298775667 | 0.0003621 NM_005261       |
| <b>CCDC151</b>                                                     | <b>0.194279346</b> |                         | 0.563474667  | 0.0003631 NM_145045       |
| <b>VNN3</b>                                                        | <b>0.194279346</b> |                         | 0.810899667  | 0.0003766 NR_028290       |
| <b>FURIN</b>                                                       | <b>0.194279346</b> |                         | 1.012876     | 0.0003783 NM_002569       |
| ---                                                                | <b>0.194279346</b> |                         | 0.544883667  | 0.0003793 ENST00000470887 |
| <b>STYK1</b>                                                       | <b>0.199898667</b> |                         | 1.076626333  | 0.0003971 NM_018423       |
| <b>SPAG5</b>                                                       | <b>0.209295324</b> |                         | -1.853380333 | 0.0004349 NM_006461       |
| <b>LGALS17A</b>                                                    | <b>0.209295324</b> |                         | 0.614917667  | 0.0004358 NR_034156       |
| <b>C7orf34</b>                                                     | <b>0.209295324</b> |                         | 0.572407     | 0.0004373 NM_178829       |
| ---                                                                | <b>0.212105936</b> |                         | 0.479675333  | 0.0004525 ENST00000516879 |
| <b>C20orf151</b>                                                   | <b>0.212105936</b> |                         | 0.511883667  | 0.0004577 NM_080833       |
| <b>SLC22A12</b>                                                    | <b>0.2159028</b>   |                         | 0.497858667  | 0.0004732 NM_144585       |
| <b>SOD2</b>                                                        | <b>0.219531946</b> |                         | 0.871593667  | 0.0004905 NM_01024465     |
| <b>COMMD9</b>                                                      | <b>0.219531946</b> |                         | 0.520874333  | 0.0004989 NM_014186       |
| ---                                                                | <b>0.219531946</b> |                         | -0.536388333 | 0.0005112 ENST00000410424 |
| ---                                                                | <b>0.219531946</b> |                         | 0.608298333  | 0.0005133 ENST00000469282 |

| TABLE: DISEASE SIGNATURE: 2-WAY ANOVA INTERACTION EFFECT; FDR<0.25 |                    |                         |              |                              |
|--------------------------------------------------------------------|--------------------|-------------------------|--------------|------------------------------|
| Gene_Symbol                                                        | adj.P.Val (FDR)    | logFC Alpha vs iPSC T24 | P.Value      | mRNA.Accession               |
| <b>PRDM16</b>                                                      | <b>0.219531946</b> |                         | 0.516072667  | 0.0005188 NM_022114          |
| ---                                                                | <b>0.221976556</b> |                         | 0.588018667  | 0.0005322 ENST00000490342    |
| ---                                                                | <b>0.223906356</b> |                         | 0.95598667   | 0.0005601 ENST00000516933    |
| ---                                                                | <b>0.223906356</b> |                         | -2.844913333 | 0.0005653 GENSSCAN0000020996 |
| <b>SLC4A8</b>                                                      | <b>0.223906356</b> |                         | -0.204568333 | 0.000566 NM_001039960        |
| ---                                                                | <b>0.223906356</b> |                         | 0.616375333  | 0.0005711 ENST00000462689    |
| <b>DNAH14</b>                                                      | <b>0.223906356</b> |                         | 0.708480333  | 0.0005866 NM_001373          |
| <b>RBMLX3</b>                                                      | <b>0.223906356</b> |                         | 0.536356333  | 0.0005871 NM_001145346       |
| <b>LSM14B</b>                                                      | <b>0.223906356</b> |                         | -0.608586333 | 0.0005905 NM_144703          |
| <b>C1QTNF1</b>                                                     | <b>0.225500686</b> |                         | 1.047790667  | 0.0006112 NM_030968          |
| <b>SIRPA</b>                                                       | <b>0.225500686</b> |                         | 0.853482667  | 0.0006147 NM_001040022       |
| ---                                                                | <b>0.225500686</b> |                         | 0.502454     | 0.0006216 ENST00000364309    |
| ---                                                                | <b>0.225500686</b> |                         | -0.706863    | 0.0006256 ENST00000466549    |
| <b>GDPD2</b>                                                       | <b>0.227361845</b> |                         | -1.2859      | 0.0006473 NM_001171192       |
| <b>VSIG8</b>                                                       | <b>0.227361845</b> |                         | 0.559231667  | 0.0006487 NM_001013661       |
| ---                                                                | <b>0.227361845</b> |                         | 0.585405667  | 0.0006541 ENST00000469816    |
| <b>SCARA3</b>                                                      | <b>0.235795427</b> |                         | -1.048902    | 0.0006946 NM_016240          |
| <b>VNN2</b>                                                        | <b>0.235795427</b> |                         | 0.542387667  | 0.0007088 NM_004665          |
| ---                                                                | <b>0.235795427</b> |                         | 0.776246     | 0.0007091 AB062477           |
| ---                                                                | <b>0.235795427</b> |                         | -0.806129333 | 0.0007178 ENST00000485415    |
| <b>ANGPTL4</b>                                                     | <b>0.235795427</b> |                         | 1.398495333  | 0.0007187 NM_139314          |
| ---                                                                | <b>0.237970592</b> |                         | 0.681261333  | 0.0007335 ENST00000384144    |
| ---                                                                | <b>0.238118688</b> |                         | 0.469489     | 0.0007421 ENST00000517020    |
| <b>RIMBP3</b>                                                      | <b>0.239098981</b> |                         | 0.417748     | 0.0007533 NM_015672          |
| <b>BIN1</b>                                                        | <b>0.249495739</b> |                         | -1.057385667 | 0.0007963 NM_139343          |
| ---                                                                | <b>0.249495739</b> |                         | 1.00222667   | 0.00081 NM_00000411306       |
| <b>MBOAT4</b>                                                      | <b>0.249495739</b> |                         | 0.486972     | 0.0008414 NM_001100916       |
| ---                                                                | <b>0.249495739</b> |                         | 0.759812     | 0.0008696 ENST00000459212    |
| <b>CENPI</b>                                                       | <b>0.249495739</b> |                         | -1.301527333 | 0.0008794 NM_006733          |
| <b>PDZK1IP1</b>                                                    | <b>0.249495739</b> |                         | 1.262729667  | 0.0008899 NM_005764          |
| <b>FLJ43763</b>                                                    | <b>0.249495739</b> |                         | 0.592882333  | 0.0008916 ENST00000381078    |
| <b>AZGP1</b>                                                       | <b>0.249495739</b> |                         | 0.897379     | 0.0008922 NM_001185          |
| <b>TNFSF10</b>                                                     | <b>0.249495739</b> |                         | 1.447382     | 0.0008922 NM_003810          |
| <b>BHLHE41</b>                                                     | <b>0.249495739</b> |                         | -0.876479667 | 0.0009045 NM_030762          |
| <b>FAM49A</b>                                                      | <b>0.249495739</b> |                         | -1.123131333 | 0.0009089 NM_030797          |
| <b>ZYG11A</b>                                                      | <b>0.249495739</b> |                         | -1.441144333 | 0.0009157 NM_001004339       |
| <b>LRG1</b>                                                        | <b>0.249495739</b> |                         | 0.693725667  | 0.0009164 NM_052972          |
| <b>COX7A1</b>                                                      | <b>0.249495739</b> |                         | -0.812038667 | 0.0009419 NM_001864          |
| <b>C2orf83</b>                                                     | <b>0.249495739</b> |                         | 0.599935     | 0.0009563 NM_020161          |
| <b>BATF</b>                                                        | <b>0.249495739</b> |                         | 0.612902     | 0.0009624 NM_006399          |
| <b>PSG5</b>                                                        | <b>0.249495739</b> |                         | -2.975424333 | 0.0009645 NM_002781          |
| ---                                                                | <b>0.249495739</b> |                         | 0.549399667  | 0.0009702 ENST00000484467    |
| <b>EHF</b>                                                         | <b>0.249495739</b> |                         | 1.758787667  | 0.0009958 NM_012153          |
| <b>KY</b>                                                          | <b>0.249495739</b> |                         | 0.474578333  | 0.0010185 NM_178554          |
| ---                                                                | <b>0.249495739</b> |                         | 0.530830667  | 0.0010269 ENST00000505282    |
| <b>KIF22</b>                                                       | <b>0.249495739</b> |                         | -1.472044    | 0.0010341 NM_007317          |
| <b>GALNT5</b>                                                      | <b>0.249495739</b> |                         | 1.475392333  | 0.0010432 NM_014568          |
| <b>TGM2</b>                                                        | <b>0.249495739</b> |                         | 0.690833     | 0.001051 NM_004613           |
| <b>KIF22</b>                                                       | <b>0.249495739</b> |                         | -1.478056333 | 0.0010542 NM_007317          |
| ---                                                                | <b>0.249495739</b> |                         | 0.546366667  | 0.0010566                    |
| <b>OR5A2</b>                                                       | <b>0.249495739</b> |                         | 0.772161667  | 0.0010634 NM_001001954       |
| ---                                                                | <b>0.249495739</b> |                         | -1.686442667 | 0.0010741 NM_199286.2        |
| <b>CPD</b>                                                         | <b>0.249495739</b> |                         | 0.589138333  | 0.0010802 NM_001304          |
| <b>ABHD10</b>                                                      | <b>0.249495739</b> |                         | -0.79874     | 0.0010842 NM_018394          |
| <b>GCM1</b>                                                        | <b>0.249495739</b> |                         | -0.595818667 | 0.0010876 NM_003643          |
| <b>RIMBP3</b>                                                      | <b>0.249495739</b> |                         | 0.441950667  | 0.0010905 NM_015672          |
| ---                                                                | <b>0.249495739</b> |                         | 0.506613     | 0.0010976 ENST00000516864    |
| <b>PLEK2</b>                                                       | <b>0.249495739</b> |                         | 1.571881     | 0.0011055 NM_016445          |
| <b>NUSAP1</b>                                                      | <b>0.249495739</b> |                         | -1.449468333 | 0.0011097 NM_016359          |
| ---                                                                | <b>0.249495739</b> |                         | 1.235091667  | 0.0011099 ENST00000365415    |
| ---                                                                | <b>0.249495739</b> |                         | 0.429498     | 0.0011166 ENST00000486780    |
| ---                                                                | <b>0.249495739</b> |                         | 0.977655667  | 0.0011282 AK097085           |
| <b>FLJ36840</b>                                                    | <b>0.249495739</b> |                         | 0.942958333  | 0.0011298 AK094159           |
| <b>CDCA7</b>                                                       | <b>0.249495739</b> |                         | -1.021459667 | 0.0011363 NM_031942          |
| ---                                                                | <b>0.249495739</b> |                         | 0.640481667  | 0.0011393 ENST00000364488    |
| ---                                                                | <b>0.249495739</b> |                         | 0.901475667  | 0.0011515 ENST00000493687    |
| <b>TNFAIP6</b>                                                     | <b>0.249495739</b> |                         | -1.582938    | 0.0011536 NM_007115          |

**Table S1:** PiZZ disease-specific transcriptomic signature. Post-hoc moderated t testing of the “interaction effect” identified 135 differentially expressed transcripts at T24 in PiZZ diseased versus normal iPSC-hepatic cells.

|                    | <b>miRNA</b> |           |            | <b>methylation</b> |           |            |
|--------------------|--------------|-----------|------------|--------------------|-----------|------------|
|                    | <b>T0</b>    | <b>T5</b> | <b>T24</b> | <b>T0</b>          | <b>T5</b> | <b>T24</b> |
| <b>PiZZ:ESC/WT</b> |              |           |            |                    |           |            |
| <b>Up</b>          | 0            | 0         | 0          | 20                 | 37        | 150        |
| <b>Down</b>        | 0            | 0         | 0          | 3                  | 39        | 45         |
| <b>Unchanged</b>   | 638          | 638       | 638        | 322311             | 322258    | 322139     |

**Table S2:** Summary of changes in miRNA expression and CpG methylation between diseased and normal pluripotent stem cells at key developmental stages. PiZZ iPSCs are compared to WT iPSCs and ESCs. FDR adjusted q values are <0.001 (miRNA), and <0.05 (methylation).



| GeneSymbol      | GeneName                                                              | Gene Expression |          |                | Methylation         |             |          | Correlation         |         |
|-----------------|-----------------------------------------------------------------------|-----------------|----------|----------------|---------------------|-------------|----------|---------------------|---------|
|                 |                                                                       | Fold Change     | P Value  | FDR-adjusted P | ID Methylation Site | Fold Change | P Value  | Pearson Correlation | P Value |
| <i>BATF</i>     | basic leucine zipper transcription factor, ATF-like                   | 1.53            | 9.62E-04 | 0.249          | cg09937039          | -1.81       | 6.91E-04 | -0.91               | 1.3E-02 |
| <i>BATF</i>     | basic leucine zipper transcription factor, ATF-like                   | 1.53            | 9.62E-04 | 0.249          | cg14266927          | -1.93       | 2.81E-03 | -0.86               | 2.9E-02 |
| <i>BATF</i>     | basic leucine zipper transcription factor, ATF-like                   | 1.53            | 9.62E-04 | 0.249          | cg14424070          | -3.38       | 5.55E-03 | -0.89               | 1.7E-02 |
| <i>BATF</i>     | basic leucine zipper transcription factor, ATF-like                   | 1.53            | 9.62E-04 | 0.249          | cg15645309          | -1.82       | 1.48E-02 | -0.86               | 2.9E-02 |
| <i>BATF</i>     | basic leucine zipper transcription factor, ATF-like                   | 1.53            | 9.62E-04 | 0.249          | cg21531300          | -2.85       | 3.60E-03 | -0.91               | 1.1E-02 |
| <i>BATF</i>     | basic leucine zipper transcription factor, ATF-like                   | 1.53            | 9.62E-04 | 0.249          | cg22995449          | -2.02       | 1.57E-03 | -0.83               | 3.9E-02 |
| <i>BATF</i>     | basic leucine zipper transcription factor, ATF-like                   | 1.53            | 9.62E-04 | 0.249          | cg23723793          | -1.92       | 4.03E-03 | -0.91               | 1.2E-02 |
| <i>C1QTNF1</i>  | C1q and tumor necrosis factor related protein 1                       | 2.07            | 6.11E-04 | 0.226          | cg14020904          | -1.33       | 1.36E-02 | -0.92               | 9.5E-03 |
| <i>C1QTNF1</i>  | C1q and tumor necrosis factor related protein 1                       | 2.07            | 6.11E-04 | 0.226          | cg17758081          | -1.29       | 7.56E-03 | -0.85               | 3.0E-02 |
| <i>C1R</i>      | complement component 1, r subcomponent                                | 1.77            | 2.85E-04 | 0.188          | cg08799922          | -1.43       | 2.02E-02 | -0.85               | 3.1E-02 |
| <i>CFHR1</i>    | complement factor H-related 1                                         | 5.74            | 3.15E-04 | 0.188          | cg12687463          | -1.56       | 2.73E-03 | -0.83               | 4.3E-02 |
| <i>GRM4</i>     | glutamate receptor, metabotropic 4                                    | 1.74            | 3.61E-05 | 0.116          | cg08969344          | -1.20       | 2.48E-02 | -0.89               | 1.7E-02 |
| <i>HAVCR2</i>   | hepatitis A virus cellular receptor 2                                 | 4.85            | 2.04E-06 | 0.015          | cg19110684          | -1.41       | 5.11E-03 | -0.87               | 2.4E-02 |
| <i>KCNJ6</i>    | potassium inwardly-rectifying channel, subfamily J, member 6          | 2.59            | 8.60E-06 | 0.042          | cg03531951          | -1.30       | 1.40E-02 | -0.87               | 2.6E-02 |
| <i>LRG1</i>     | leucine-rich alpha-2-glycoprotein 1                                   | 1.62            | 9.16E-04 | 0.249          | cg03882382          | -1.84       | 1.52E-03 | -0.81               | 4.8E-02 |
| <i>LRG1</i>     | leucine-rich alpha-2-glycoprotein 1                                   | 1.62            | 9.16E-04 | 0.249          | cg17272620          | -1.39       | 7.14E-03 | -0.96               | 2.1E-03 |
| <i>LRG1</i>     | leucine-rich alpha-2-glycoprotein 1                                   | 1.62            | 9.16E-04 | 0.249          | cg22375763          | -1.48       | 1.67E-02 | -0.89               | 1.6E-02 |
| <i>MBOAT4</i>   | membrane bound O-acyltransferase domain containing 4                  | 1.40            | 8.41E-04 | 0.249          | cg00940560          | -1.51       | 3.53E-02 | -0.85               | 3.2E-02 |
| <i>MBOAT4</i>   | membrane bound O-acyltransferase domain containing 4                  | 1.40            | 8.41E-04 | 0.249          | cg21058822          | -2.60       | 2.71E-02 | -0.94               | 5.2E-03 |
| <i>PRDM16</i>   | PR domain containing 16                                               | 1.43            | 5.19E-04 | 0.22           | cg04873098          | -1.40       | 3.80E-02 | -0.96               | 2.6E-03 |
| <i>PRDM16</i>   | PR domain containing 16                                               | 1.43            | 5.19E-04 | 0.22           | cg15519786          | -2.01       | 3.18E-02 | -0.83               | 4.0E-02 |
| <i>PRDM16</i>   | PR domain containing 16                                               | 1.43            | 5.19E-04 | 0.22           | cg17220278          | -1.19       | 4.14E-02 | -0.89               | 1.6E-02 |
| <i>PRDM16</i>   | PR domain containing 16                                               | 1.43            | 5.19E-04 | 0.22           | cg21789941          | -1.70       | 2.62E-03 | -0.85               | 3.0E-02 |
| <i>SLC22A12</i> | solute carrier family 22 (organic anion/urate transporter), member 12 | 1.41            | 4.73E-04 | 0.216          | cg07220939          | -1.59       | 3.87E-03 | -0.95               | 3.4E-03 |
| <i>TNFSF10</i>  | tumor necrosis factor (ligand) superfamily, member 10                 | 2.73            | 8.92E-04 | 0.249          | cg08144586          | -1.28       | 8.60E-03 | -0.87               | 2.6E-02 |
| <i>VSIG8</i>    | V-set and immunoglobulin domain containing 8                          | 1.47            | 6.49E-04 | 0.227          | cg21574855          | -1.46       | 5.12E-03 | -0.85               | 3.3E-02 |

**Table S3** Anticorrelation of gene expression and CpG methylation in genes comprising the PiZZ disease signature. 13 of the 135 genes comprising the signature exhibit differential methylation at the indicated sites that is decreased in PiZZ iPSC-hepatic cells in comparison with WT and anticorrelated with gene expression (increased in PiZZ iPSC-hepatic cells compared to WT).

## Supplemental Experimental Procedures:

*Production of iPSCs from human fibroblasts.* Normal human dermal fibroblast-derived iPSCs were generated by reprogramming with a single-integrated excisable copy of the floxed hSTEMCCA lentiviral reprogramming vector (Somers et al., 2010) followed by excision with transient Cre recombinase-exposure. These three lines generated from three separate individuals have been previously characterized, published, and named (BMC1, CHOPWT3.1, and HR11-3 (Mills et al., 2013; Somers et al., 2010; Terrenoire et al., 2012)). PiZZ fibroblasts, isolated by 6-mm full thickness arm skin punch biopsy from volunteer subjects with AAT deficiency as previously described (Somers et al., 2010), were grown in DMEM with 10% FBS. The recruitment of human subjects and all iPSC studies were approved by the Boston University Institutional Review Board (BUMC IRB H-27636). For reprogramming, fibroblasts were transduced with the humanized hSTEMCCA lentiviral reprogramming vector (Mills et al., 2013; Somers et al., 2010). iPSC colonies were mechanically isolated 30 days after transduction and expanded on MEF feeders in human iPSC media. Integrated hSTEMCCA copy number was assessed by Southern blot of gDNA extracts as previously published (Somers et al., 2010), and only iPSC clones with single copy hSTEMCCA integrations were selected for vector excision and further study.

*iPSC expansion and characterization.* iPSC clones were passaged and expanded in hiPSC media for a minimum of 20 passages prior to additional experimentation. Clones were characterized for expression of genes associated with pluripotency and teratoma assays performed as previously published to confirm functional pluripotency (Somers et al., 2010). Where indicated in the text and supplement, global transcriptomes were scored by Pluritest assay to obtain pluripotency array scores (Müller et al., 2011).

*Cre-mediated hSTEMCCA excision.* The single copy hSTEMCCA lentiviral cassette was removed from each iPSC clone via transient transfection of pHAGE2-Cre-IRES-PuroR plasmid DNA using Hela Monster transfection reagent (Mirus, Madison, WI, [www.mirusbio.com](http://www.mirusbio.com)) according to the manufacturer's instructions (Somers et al., 2010). Approximately 11-14 days later, colonies were picked and gDNA from each subclone screened for vector excision by PCR using the following primers and conditions: cMYC F5'-GGA ACT CTT GTG CGT AAG TCG ATA G-3'; WPRE R5'-GGA GGC GGC CCA AAG GGA GAT CCG-3'; 95° C for 3 minutes; followed by 33 cycles of 94° C for 30 seconds, 60° C for 30 seconds, and 72° C for 1 minute; followed by a single cycle of 72° C for 5 minutes. Vector excision was then confirmed by Southern blot using BamHI digested gDNA probed for the WPRE element as previously published (Somers et al., 2010).

*Cell culture and maintenance of PSCs.* iPSC and ESC lines were maintained in "hiPSC Media" composed of DMEM/F12 (Sigma-Aldrich) with 20% KnockOut Serum Replacement (Invitrogen), 1mM nonanimal L-glutamine (Sigma-Aldrich), 0.1mM B-mercaptoethanol, and 10 ng/ml FGF2 (R&D Systems) on 0.1% gelatin (Sigma-Aldrich) coated plates preseeded with mitomycin C-inactivated or irradiated mouse embryonic fibroblast (MEF) feeder cells. Cells were maintained in a 5% CO<sub>2</sub> air environment.

*Directed Endodermal and Hepatic Differentiation of PSCs.* Human PSCs were differentiated using previously described protocols (Cheng et al., 2012). For endodermal differentiation, cells were passed onto matrigel-coated dishes at 80% confluency. On the following day, designated "T0", differentiation was induced by culture in media containing growth factors listed below. From T0-T6, differentiation media included 2mM L-glutamine, and 4.5x10<sup>-4</sup> M monothioglycerol (MTG). Cells were grown in T0 media, consisting of RPMI-based serum-free medium with Chir

99021 (2ug/ml) and Activin A (100 ng/ml), for one day. On days “T1-2”, medium was changed to RPMI with BMP4 (0.5 ng/ml), FGF2 (10ng/ml), Activin A (100 ng/ml), and VEGF (10 ng/ml). On days “T3-4”, cells were cultured in SFD media(Gouon-Evans et al., 2006) with BMP4 (0.5 ng/ml), FGF2 (10ng/ml), Activin A (100 ng/ml), and VEGF (10 ng/ml). For hepatic differentiation, PSCs were differentiated as monolayer cultures as outlined above to generate definitive endoderm and then further differentiated for an additional 3 weeks in SFD-based media with ascorbic acid (50mcg/ml), monothioglycerol ( $4.5 \times 10^{-4}$  M), and the following supplements: T7-12: BMP4 (50 ng/ml), FGF2 (10 ng/ml), VEGF (10 ng/ml), EGF (10ng/ml), TGF $\alpha$  (20 ng/ml), HGF (100 ng/ml), and 0.1 uM Dexamethasone; T13-18: FGF2 (10 ng/ml), VEGF (10 ng/ml), EGF (10 ng/ml), HGF (100 ng/ml), Oncostatin M (20 ng/ml), Vitamin K (6 ug/ml), 1.5 uM gamma secretase inhibitor, 0.1 uM Dexamethasone, and 1% DMSO; T19-24: HGF (100 ng/ml), Oncostatin M (20 ng/ml), Vitamin K (6 ug/ml), and 0.1 uM Dexamethasone. Differentiating human PSCs were maintained in a 5% CO<sub>2</sub>, 5% O<sub>2</sub>, 90% N<sub>2</sub> environment.

*Flow cytometry and cell sorting.* PSCs were stained with antibodies for the following cell surface antigens: CD117-APC (Invitrogen, #11705), CXCR4-PE (Invitrogen, #MHCXCR404), TRA-1-81-Alexa Fluor 647 (Biolegend, #330706), and SSEA3-AlexaFlour488 (Biolegend, #330306). For staining of intracellular antigens, cells were fixed in 1.6% paraformaldehyde for 20 minutes at 37°C and then permeabilized in saponin buffer (Biolegend). Fixed cells were stained with antibodies against human FOXA1 (Santa Cruz, #sc-101058), AAT (Santa Cruz, #sc-59438), or AFP (R&D, # MAB1368) followed by goat anti-mouse IgG2a-DyLight488 (Jackson ImmunoResearch, # 115-485-206), IgG1-DyLight649 (Jackson ImmunoResearch, #705-496-147) or IgG-AlexaFluor647(Jackson ImmunoResearch, # 115-605-205) antibodies. For all flow cytometry experiments, gating was based on isotype-stained controls. Staining was quantified using a FACSCantos II flow cytometer (BD Biosciences) and analyzed with FlowJo software (Tree Star Inc). To obtain cell pure populations for analysis, T0 and T5 cells were first sorted by flow sorting SSEA3/TRA-1-81 double positive (T0) or CD117/CXCR4 double positive (T5) cells on a FACS Aria II (Becton Dickenson) sorter. Cells were resuspended in Qiazol Lysis Reagent (Qiagen) and snap frozen before storage at -80°C.

*Gene expression microarray analysis.* Biotin labeling of large RNA was performed using the Ambion WT Expression Kit (Life Technologies, Grand Island, NY) according to the manufacturer's protocol, followed by the GeneChip WT Terminal Labeling and Controls Kit (Affymetrix, Santa Clara, CA). Biotin labeling of small RNA was performed using the Affymetrix FlashTag Biotin HSR RNA Labeling Kit according to the manufacturer's protocol. Labeled, fragmented DNA was then hybridized to Affymetrix GeneChip Human Gene 1.0 ST or miRNA 2.0 arrays, and after staining, microarrays were immediately scanned using an Affymetrix GeneArray Scanner 3000 7G Plus. Human Gene 1.0 ST arrays were normalized to produce gene-level expression values using the implementation of the Robust Multiarray Average (RMA) in the Affymetrix Expression Console software package. miRNA 2.0 arrays were normalized to produce probeset-level expression values using the Affymetrix miRNA QC Tool (version 1.1.1.0), using default background detection, RMA global background correction, quantile normalization, and median polish summarization. Analysis was limited to the 1,105 human microRNAs interrogated by the array. Human Gene 1.0 ST and miRNA 2.0 files have been deposited in the Gene Expression Omnibus (GEO accession number GSE66078).

*DNA methylation microarray analysis.* Quantitative measurement of DNA methylation in study samples was achieved using Illumina's Infinium HD Methylation Assay with HumanMethylation 450 BeadChip arrays. Briefly, 500ng gDNA extracted from hESCs, iPSCs derived from normal individuals, and iPSCs from alpha-1 antitrypsin deficient patients underwent bisulfite conversion of unmethylated cytosine bases to uracil. Bisulfite converted DNA was then amplified and

purified prior to overnight hybridization to BeadChip arrays. Next day staining of hybridized arrays produced methylation-dependent differential fluorescence that was detected via an Illumina iScan array scanner. Arrays were visualized and processed using the GenomeStudio software package, which produced IDAT files that were read into a MethyLumiSet using the *methylumiIDAT* function in the *methylumi* R package (version 2.4.0). This object was then coerced to a MethyLumiM object, quantile-normalized by sequentially applying the *lumiMethyC* and *lumiMethyN* functions from the *lumi* R package (version 2.10.0), and annotated using the *IlluminaHumanMethylation450k.db* R package (version 1.4.7). Differential methylation between wildtype and PiZZ iPSCs at stage T24 was assessed using the *limma* R package (version 3.14.4) by modeling M values as a linear function of genotype with *lmFit*, followed by empirical Bayesian adjustment with *eBayes* and a moderated *t* test performed using *topTable*. Methylation and expression probesets were matched on gene symbols in order to compute Pearson correlation coefficients between M values and log<sub>2</sub> (expression) values from iPSCs at stage T24. All methylation analyses were performed using the R environment for statistical computing (version 2.15.1). Illumina 450K files have been deposited in the Gene Expression Omnibus (GEO accession number GSE66078).

*RNA isolation and quantitative PCR analysis.* Total RNA and miRNA were isolated from cells using an miRNeasy kit (Qiagen) with the optional column RNase-free DNase treatment, according to the manufacturer's instructions. 200 nanograms to one microgram of RNA was reverse transcribed into cDNA using random hexamers with Superscript III Reverse Transcriptase (Invitrogen). Real-time, quantitative PCR (qPCR) was performed in triplicate for all samples using either SYBR Green QPCR master mix with the Light Cycler 480II qPCR System (Roche, Indianapolis, IN, [www.roche.com](http://www.roche.com)) or TaqMan primers and master mix with a StepOne Real Time PCR system (Applied Biosystems, Carlsbad, CA, [www.lifetechnologies.com](http://www.lifetechnologies.com)). For SYBR Green qPCR, a 10-fold gDNA dilution series ranging from 0.1 to 10 ng per reaction was used to evaluate the efficiency of the PCR and calculate the copy number of each gene relative to the housekeeping gene Cyclophilin. Calculated expression levels for each indicated gene were then reported as number of molecules of RNA for that gene per number of molecules of cyclophilin, as previously published (Mills et al., 2013; Somers et al., 2010). Primer sequences are: *CYCLOPHILIN*: F' GAA GAG TGC GAT CAA GAA CCC ATG AC, R' GTC TCT CCT CCT TCT CCT ATC TTT ACT T; *AAT(SERPINA1)*: F'AGG GCC TGA AGC TAG TGG ATA AGT, R' TCT GTT TCT TGG CCT CTT CGG TGT; *AFP*: F' CTA CCT GCC TTT CTG GAA GAA CTT TG, R'TCT GTT TCT TGG CCT CTT CGG TGT.

*AAT pulse-chase radiolabeling.* The kinetic of AAT post-translational intracellular processing and secretion was assayed via pulse-chase radiolabeling. Before radiolabelling, the patient-derived iPSC line B-16 and its isogenic, zinc finger nuclease-corrected daughter iPSC line B-16-C-2 were differentiated to hepatic stage and assayed via pulse-chase labelling using previously described methods (Ordóñez et al., 2013). Briefly, cells were starved in methionine (Met)- and cysteine (Cys)-free pulse medium for 90 min and then incubated with 1.3MBq of <sup>35</sup>S-Met/Cys for 30 min at 37°C to allow incorporation of radioactive amino acids. Cells were then washed and incubated in L-Met and L-Cys-supplemented chase medium for the time intervals indicated in the text before collection of cell supernatants and cell harvesting. Total protein was isolated from cell lysates using Nonidet lysis buffer (150mM NaCl, 50mM Tris-HCl pH 7.5, 1% Nonidet P-40) containing 25mM protease inhibitor mixture, followed by centrifugation. AAT was immunoprecipitated from lysates or from supernatants with a polyclonal anti-human  $\alpha_1$ -antitrypsin antibody generated by the group of Prof. D.A. Lomas (Miranda et al., 2010) and resolved by 10% v/v SDS-PAGE. Radiolabelled AAT was visualized and quantified on a Cyclone Phosphor Imager (Packard Instrument Co.). Total densitometric value of the combined

lysate and supernatant at each time point were set at 100% and the value of each component displayed as a percent of the total.

*Western Blot.* PiZZ or WT iPSCs were differentiated to T16 or T18 before treatment with either CBZ, DMSO vehicle, or regular media as described for each experiment. Cell protein lysates were collected and separated in a 12% polyacrylamide gel before transfer onto a PVDF membrane. Membranes were probed with antibodies against LC3 (Sigma-Aldrich, # L7543), p62 (Abnova, #H00008878-M0), B-actin (Sigma-Aldrich, #A5316), KDEL (Grp78, Grp94; Enzo Life Sciences, # SPA-827-F), sXBP-1 (Biolegend, #619502), I $\kappa$ B $\alpha$  (Cell Signaling Technology, #9242), or GAPDH (Millipore, # MAB374). Signal was detected using goat anti-mouse or anti-rabbit HRP substrate (Biorad) on a LAS-4000 luminescent image analyzer (Fuji) and Image J software was utilized to measure densitometry.

### **Supplemental References:**

Gouon-Evans, V., Boussemart, L., Gadue, P., Nierhoff, D., Koehler, C.I., Kubo, A., Shafritz, D.A., and Keller, G. (2006). BMP-4 is required for hepatic specification of mouse embryonic stem cell-derived definitive endoderm. *Nat Biotechnol* 24, 1402–1411.

Miranda, E., Pérez, J., Ekeowa, U.I., Hadzic, N., Kalsheker, N., Gooptu, B., Portmann, B., Belorgey, D., Hill, M., Chambers, S., et al. (2010). A novel monoclonal antibody to characterize pathogenic polymers in liver disease associated with  $\alpha$  1-antitrypsin deficiency. *Hepatology* 52, 1078–1088.
